# Supplementary material for: A facile route to fabricate thermally conductive and electrically insulating polymer composites with 3D interconnected graphene at an ultralow filler loading
Source: Royal Society of Chemistry journal article supplement (doi:10.1039/c9nr05153h), 2019-01-01
Supplement: c9nr05153h1.pdf [file c9nr05153h1.pdf]

# **A Facile Route to Fabricate Thermally Conductive and Electrically Insulating Polymer Composites with 3D Interconnected Graphene at An Ultralow Filler Loading**

*Shiqiang Song<sup>a,b</sup>, Jinyuan Wang<sup>b</sup>, Cheng Liu<sup>a</sup>, Jincheng Wang<sup>a,\*</sup>, Yong Zhang<sup>b</sup>*

<sup>a</sup> College of Chemistry and Chemical Engineering, Shanghai University of Engineering Science, Shanghai 201620, People's Republic of China

<sup>b</sup> School of Chemistry and Chemical Engineering, State Key Laboratory for Metal Matrix Composite Materials, Shanghai Jiao Tong University, Shanghai 200240, People's Republic of China

E-mail: \* [wjc406@126.com](mailto:wjc406@126.com)

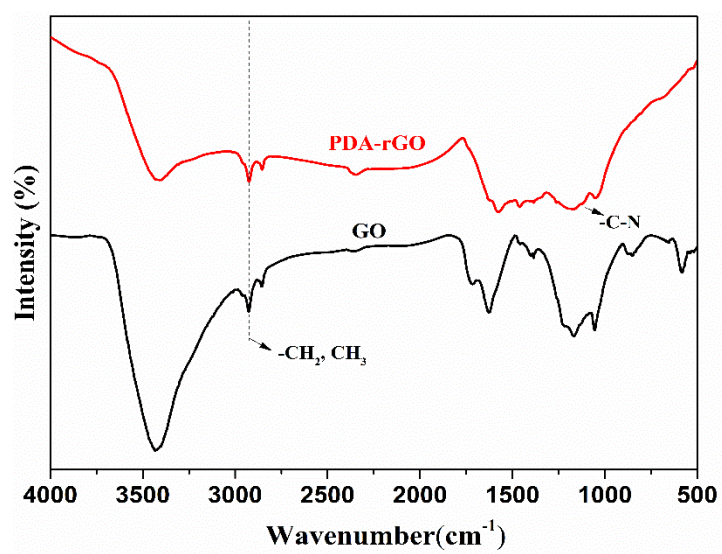

Fig S1. FTIR spectra of GO and PDA-rGO.

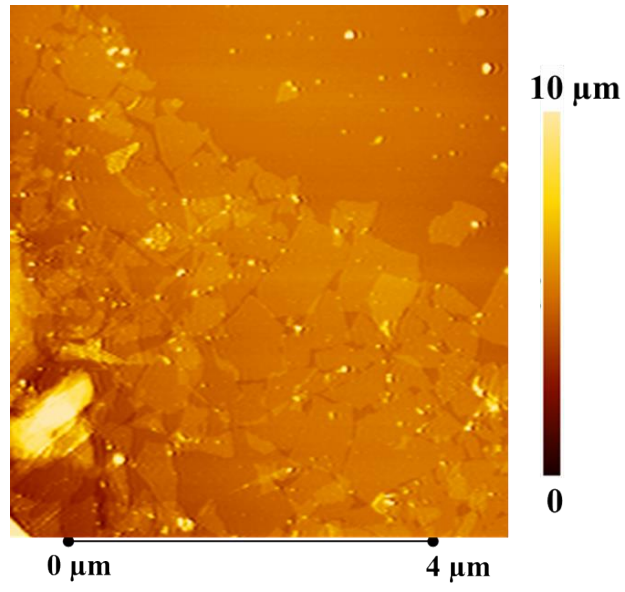

Fig S2. The AFM image of PDA-rGO.

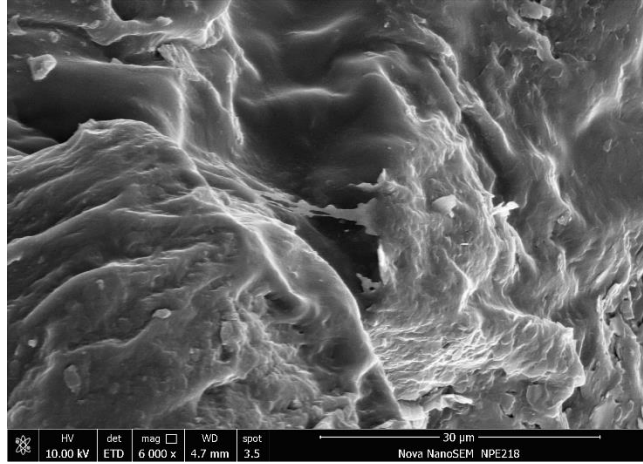

Fig S3. The SEM image of the composites at PDA-rGO loading of 0.96 wt%.

Table S1. The density and PDA-rGO loading in Sponge SR and its composites, respectively.

| <b>Sponge samples</b> | <b>Density (mg cm<sup>-3</sup>)</b> | <b>Composites</b>        | <b>PDA-rGO loadings (wt %)</b> | <b>Sponge SR loadings (wt%)</b> | <b>Density (g cm<sup>-3</sup>)</b> |
|-----------------------|-------------------------------------|--------------------------|--------------------------------|---------------------------------|------------------------------------|
| <b>Sponge- I</b>      | 322                                 | PDA-rGO/SR composite- I  | 0.10                           | 31.3                            | 1.19                               |
| <b>Sponge- II</b>     | 334                                 | PDA-rGO/SR composite- II | 0.38                           | 27.4                            | 1.22                               |
| <b>Sponge- III</b>    | 328                                 | PDA-rGO/SR composite-III | 0.96                           | 32.4                            | 1.23                               |
| <b>Sponge- IV</b>     | 330                                 | PDA-rGO/SR composite-IV  | 1.46                           | 28.2                            | 1.20                               |
| <b>Sponge- V</b>      | 323                                 | PDA-rGO/EP composite     | 0.96                           | 30.0                            | 1.15                               |
| <b>Sponge- VI</b>     | 331                                 | PDA-rGO/SBR composite    | 0.96                           | 31.1                            | 0.96                               |

Table S2. The material parameters in the analysis system.

| <b>Materials</b> | <b>Density (g<br/>cm<sup>-3</sup>)</b> | <b>Specific heat<br/>capacity(J·<br/><sup>1</sup>Kg<sup>-1</sup>K<sup>-1</sup>)</b> | <b>In-plane<br/>thermal<br/>conductivity<br/>(W m<sup>-1</sup> k<sup>-1</sup>)</b> | <b>Cross-plane<br/>thermal<br/>conductivity<br/>(W m<sup>-1</sup> k<sup>-1</sup>)</b> |
|------------------|----------------------------------------|-------------------------------------------------------------------------------------|------------------------------------------------------------------------------------|---------------------------------------------------------------------------------------|
| <b>SR</b>        | 1.09                                   | 678                                                                                 | 0.13                                                                               | 0.13                                                                                  |
| <b>rGO</b>       | 1.89                                   | 2000                                                                                | 208.2                                                                              | 4.17                                                                                  |

Table S3. The structure parameters in the analysis system.

| <b>Models</b>               | <b>Length (<math>\mu\text{m}</math>)</b> | <b>Width (<math>\mu\text{m}</math>)</b> |
|-----------------------------|------------------------------------------|-----------------------------------------|
| <b>Block of PDMS matrix</b> | 50                                       | 50                                      |

  

|                              | <b>Average Diameter (<math>\mu\text{m}</math>)</b> | <b>Average thickness (nm)</b> |
|------------------------------|----------------------------------------------------|-------------------------------|
| <b>Circular layer of rGO</b> | 2.5                                                | 2.7                           |
